# Supplementary material for: Preparation of a graphitic N-doped multi-walled carbon nanotube composite for lithium–sulfur batteries with long-life and high specific capacity
Source: Royal Society of Chemistry journal article supplement (doi:10.1039/c6ra11898d), 2016-01-01
Supplement: c6ra11898d1.pdf [file c6ra11898d1.pdf]

## Supporting Information

### Preparation of graphitic N-doped multi-walled carbon nanotubes composite for lithium-sulfur batteries with long-life and high specific capacity

Chunli Wang<sup>a,b</sup>, Feifei Zhang<sup>a,b</sup>, XuXu Wang<sup>a,b</sup>, Gang Huang<sup>a,b</sup>, Dongxia Yuan<sup>a,b</sup>, Dongming Yin<sup>a,b</sup>, Yong Cheng\*<sup>a</sup> and Limin Wang\*<sup>a</sup>

a. State Key Laboratory of Rare Earth Resource Utilization, Changchun Institute of Applied Chemistry, Chinese Academy of Sciences, Changchun, 130022, P. R. China. E-mail: lmwang@ciac.ac.cn.

b. University of Chinese Academy of Sciences, Beijing, 100049, P. R. China.

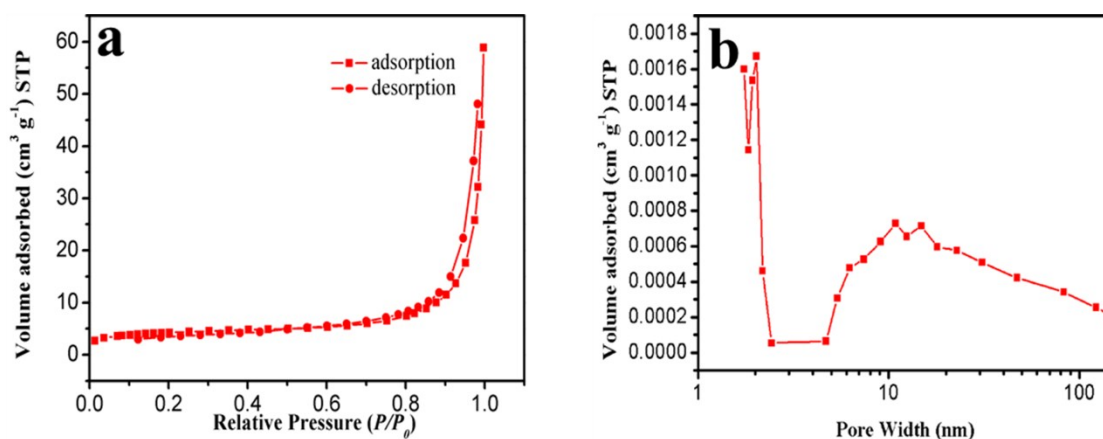

**Fig. S1** (a) Nitrogen adsorption–desorption isotherms and (b) pore size distribution of the S-GN/PNCNTs composite.

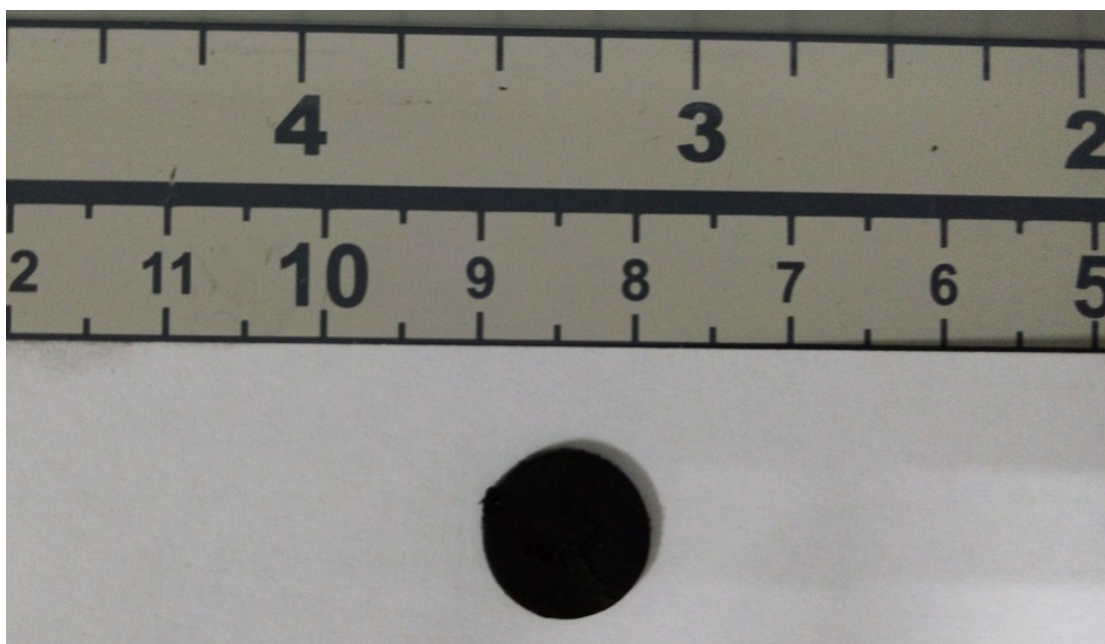

**Fig. S2** The picture of the S-GN/PNCNTs composite under the pressure of 20 MPa and keeping two minutes.

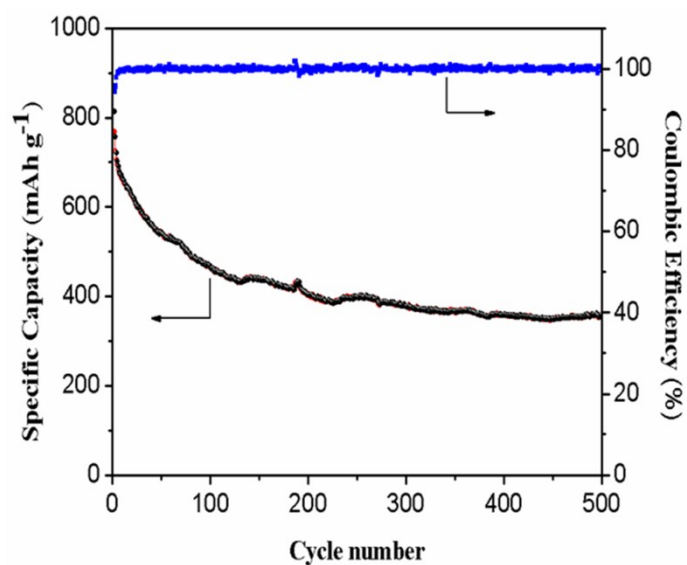

**Fig. S3** The cycling performance of the S-GN/PNCNTs composite with the active material of 2.32 mg cm<sup>-2</sup> at the current density of 0.5 C.

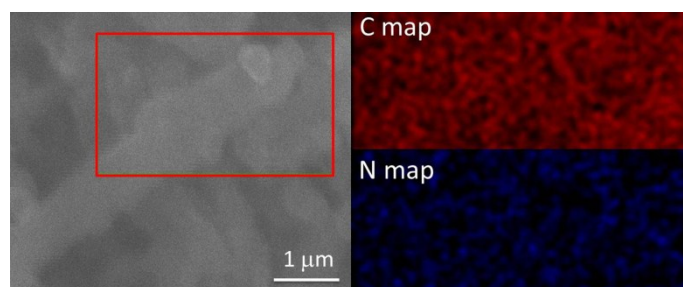

**Fig. S4** The EDS maps of the GN/PNCNTs and the C/N stoichiometric ratio on the surface of the GN/PNCNTs is about 1.09.

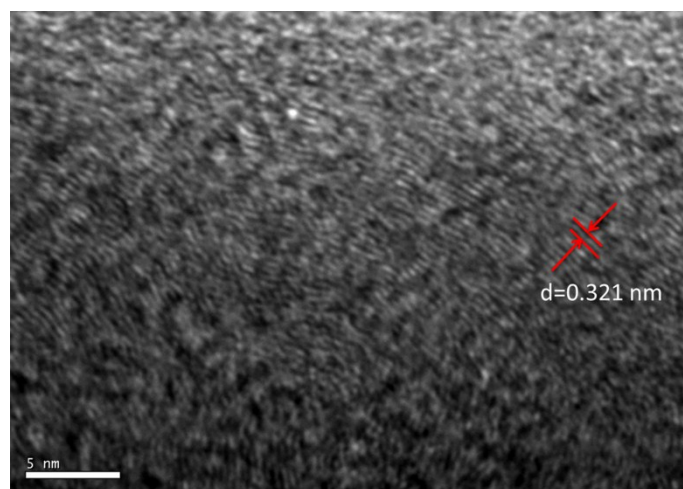

**Fig. S5** The HRTEM image for the 2D structure of the GN/PNCNTs composite and the spacing distance is 0.321 nm.
